# Supplementary material for: Long non-coding RNA TUG1 is involved in cell growth and chemoresistance of small cell lung cancer by regulating LIMK2b via EZH2
Source: Mol Cancer. 2017 Jan 9;16:5. doi: 10.1186/s12943-016-0575-6 (PMC5223434; doi:10.1186/s12943-016-0575-6)
Supplement: Additional file 5: Table S5. — qRT-PCR primers. (XLS 20 kb) [file 12943_2016_575_MOESM5_ESM.xls]

## Sheet: Sheet1
qRT-PCR primers
Gene	Forward	Reverse
si-RNAs
siTUG1 1*	CCCUCCAUGAAUACCUGAATT	UUCAGGUAUUCAUGGAGGGTT
siTUG1 2*	GGCUGAUGCAUAUGGUACATT	UGUACCAUAUGCAUCAGCCTT
siTUG1 3*	CUGGAACUCAAAGCUUGAATT	UUCAAGCUUUGAGUUCCAGTT
si-EZH2 1*	GAGGGAAAGUGUAUGAUAATT	UUAUCAUACACUUUCCCUCTT
si-EZH2 2*	GCUCCUCUAACCAUGUUUATT	GGAUCACCGAGAUGAUAAATT
si-EZH2 3*	GGAUCACCGAGAUGAUAAATT	UUUAUCAUCUCGGUGAUCCTT
ChIP-qRT-PCR primers
LIMK2b	AGGCAGTCACAGACGGATTT	GAGCTTCCCATCCTTCTCATAG
